# Supplementary material for: Blood pressure-lowering treatment strategies based on cardiovascular risk versus blood pressure: A meta-analysis of individual participant data
Source: PubMed Central journal article supplement (PMC5860698; doi:10.1371/journal.pmed.1002538), 2018-03-20

**No diabetes**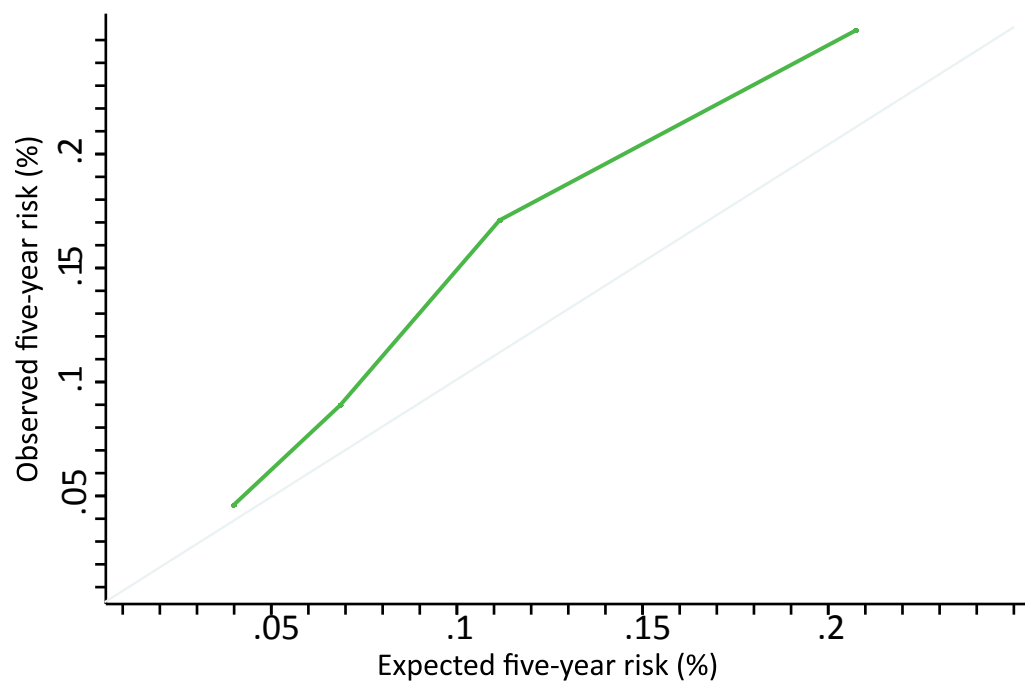**Diabetes**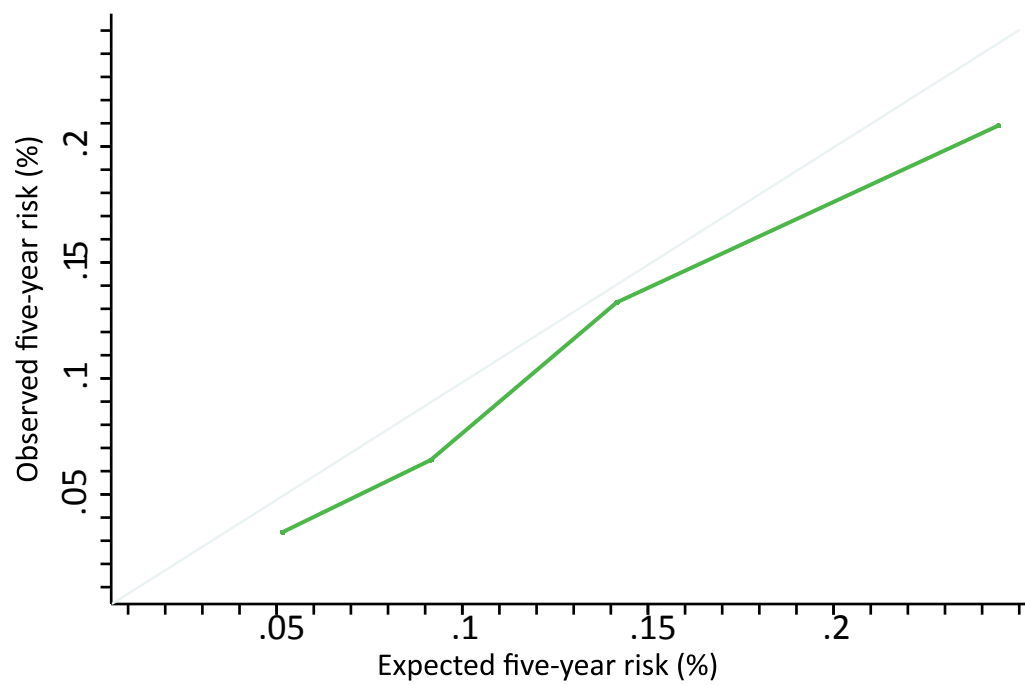**No BP-lowering drugs**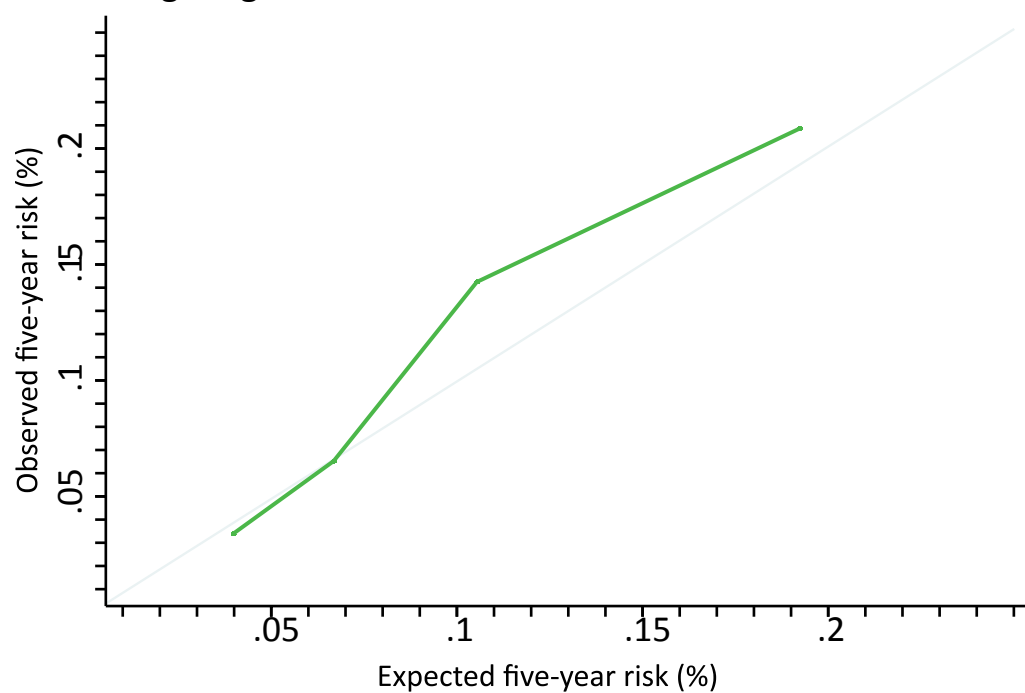**BP-lowering drugs**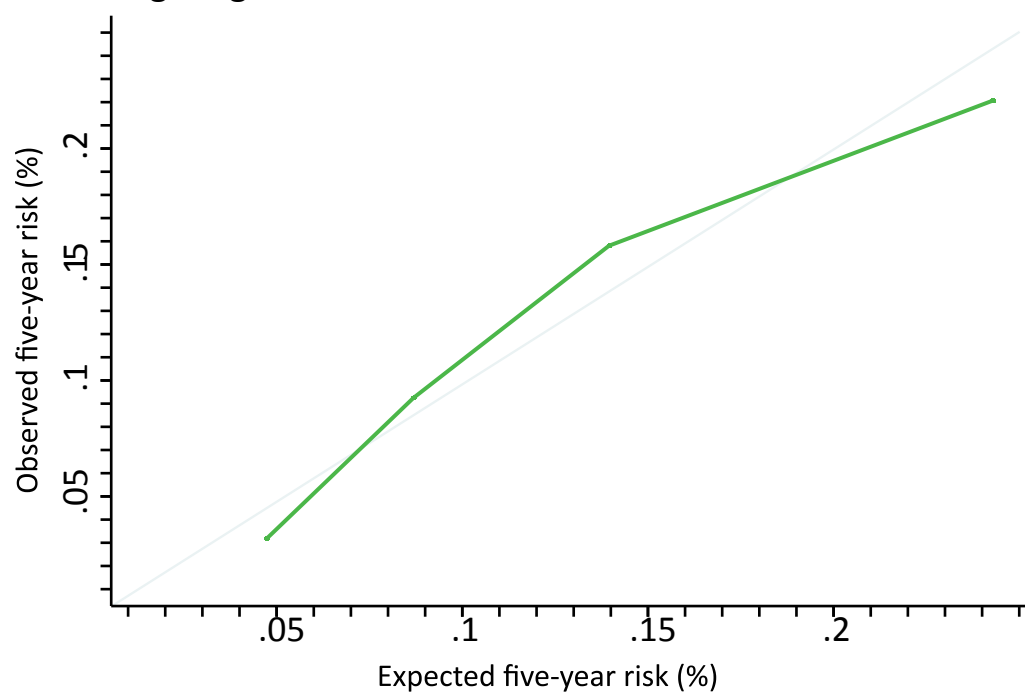**No prior CVD**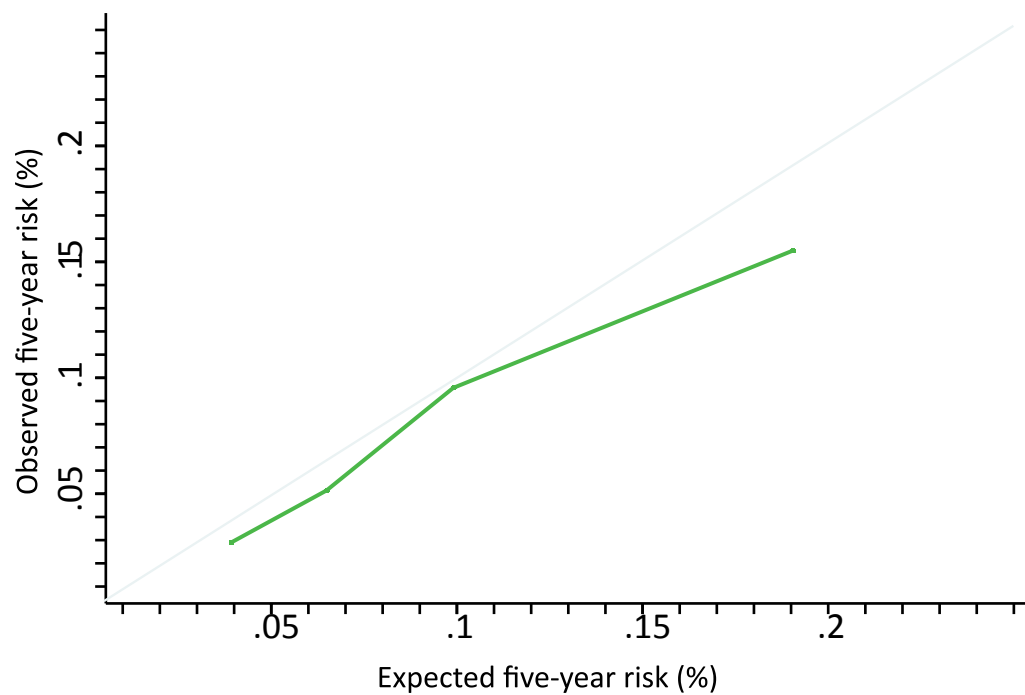**Prior CVD**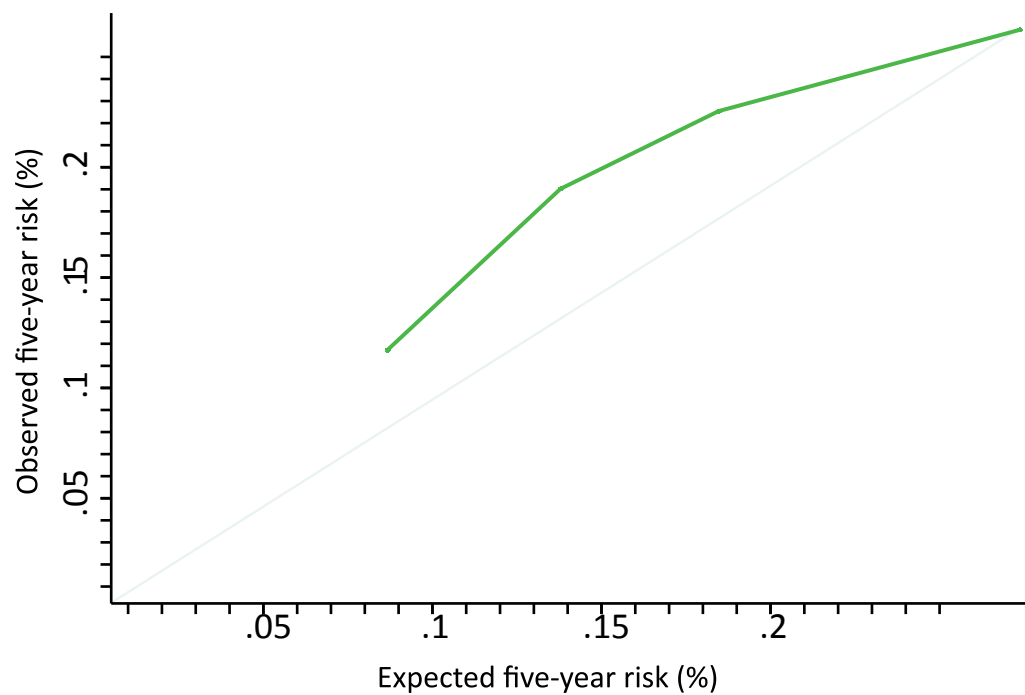

Supplement: pmed.1002538.s003.pdf [file pmed.1002538.s003.pdf]
