# Supplementary material for: Blood pressure-lowering treatment strategies based on cardiovascular risk versus blood pressure: A meta-analysis of individual participant data
Source: PubMed Central journal article supplement (PMC5860698; doi:10.1371/journal.pmed.1002538), 2018-03-20

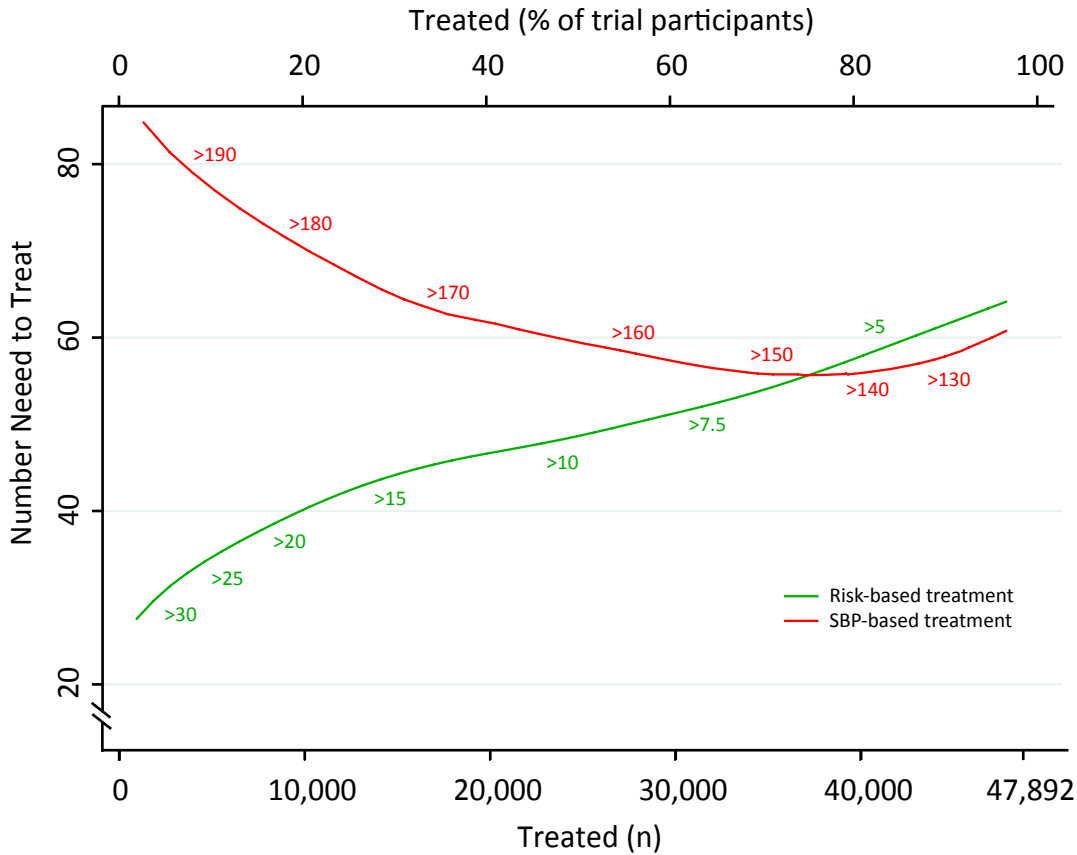

Supplement: pmed.1002538.s005.pdf [file pmed.1002538.s005.pdf]
